# Supplementary material for: Chelation of Theranostic Copper Radioisotopes with S-Rich Macrocycles: From Radiolabelling of Copper-64 to In Vivo Investigation
Source: MDPI journal article supplement (doi:10.3390/molecules27134158), 2022-06-28
Supplement: s1 [file s1]

# Supporting Information

## Chelation of Theranostic Copper Radioisotopes with S-Rich Macrocycles: From Radiolabelling of Copper-64 to *In Vivo* Investigation

Marianna Tosato<sup>1</sup>, Marco Verona<sup>2</sup>, Chiara Favaretto<sup>3</sup>, Marco Pometti<sup>4</sup>, Giordano Zanoni<sup>1</sup>, Fabrizio Scopelliti<sup>4</sup>, Francesco Paolo Cammarata<sup>5</sup>, Luca Morselli<sup>6</sup>, Zeynep Talip<sup>3</sup>, Nicholas P. van der Meulen<sup>3,7</sup>, Valerio Di Marco<sup>1</sup>, Mattia Asti<sup>8,\*</sup>

<sup>1</sup> Department of Chemical Sciences, University of Padova, via Marzolo 1, 35131 Padova, Italy; marianna.tosato@unipd.it (M.T.); giordano.zanoni@unipd.it (G.Z.); valerio.dimarco@unipd.it (V.D.M.)

<sup>2</sup> Department of Pharmaceutical Sciences, University of Padova, via Marzolo 8, 35131 Padova, Italy; marco.verona@phd.unipd.it (M.V.)

<sup>3</sup> Center for Radiopharmaceutical Sciences, Paul Scherrer Institute, 5232 Villigen-PSI, Switzerland; chiara.favaretto@psi.ch (C.F.); zeynep.talip@psi.ch (Z.T.); nick.vandermeulen@psi.ch (N.V.D.M.)

<sup>4</sup> Nuclear Medicine Department, Cannizzaro Hospital, via Messina 829, 95126 Catania, Italy; marco.pometti@gmail.com (M.P.); fabrizioscopelliti@gmail.com (F.S.)

<sup>5</sup> Institute of Molecular Bioimaging and Physiology, National Research Council (IBFM-CNR), 90015 Cefalù, Italy; francesco.cammarata@ibfm.cnr.it (F.P.C.)

<sup>6</sup> Italian Institute of Nuclear Physics, Legnaro National Laboratories, viale dell'Università 2, 35020 Legnaro, Padova, Italy; luca.morselli@lnl.infn.it (L.M.)

<sup>7</sup> Laboratory of Radiochemistry, Paul Scherrer Institute, 5232 Villigen-PSI, Switzerland

<sup>8</sup> Radiopharmaceutical Chemistry Section, Nuclear Medicine Unit, AUSL-IRCCS di Reggio Emilia, via Amendola 2, 42122 Reggio Emilia, Italy; mattia.asti@auls.re.it (M.A.)

\* **Correspondence:** mattia.asti@auls.re.it

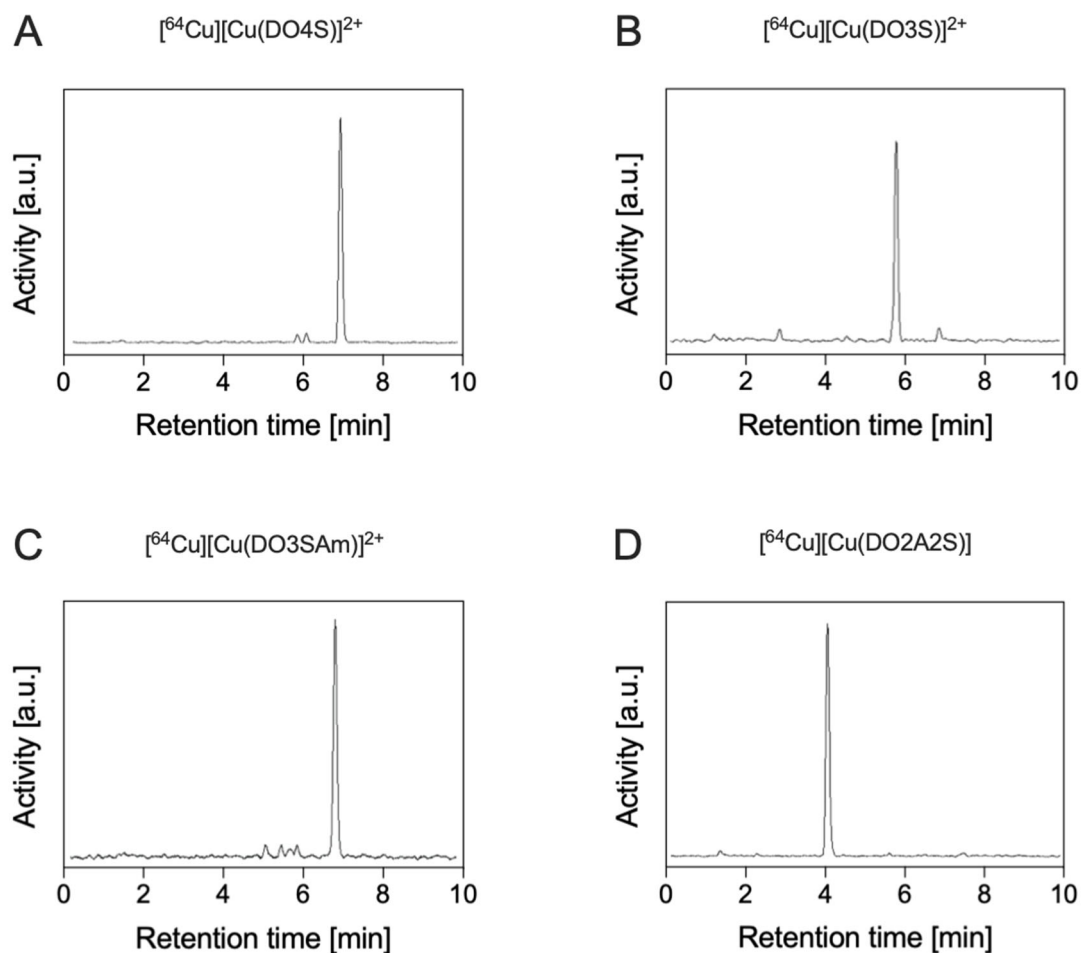

**Figure S1.** Paradigmatic radio-chromatograms of quantitative  $[^{64}\text{Cu}]\text{Cu}^{2+}$ -labelled cyclen-based ligands (1 MBq/nmol).

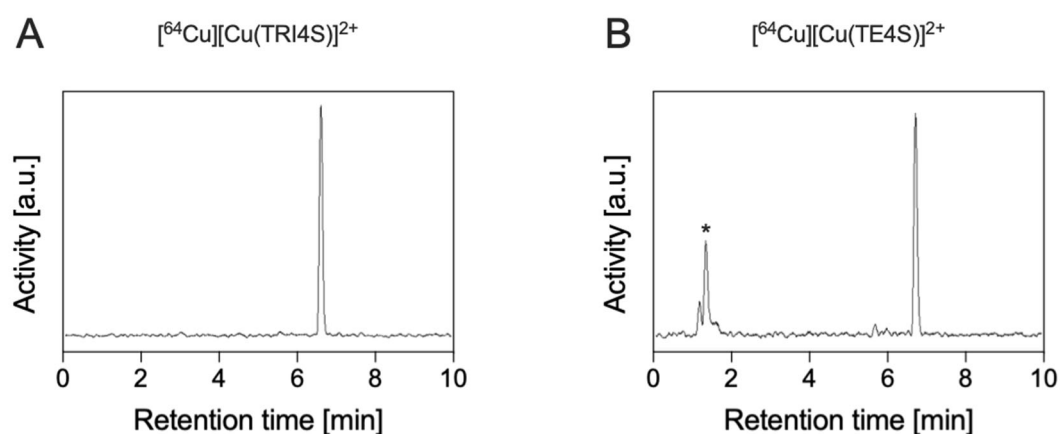

**Figure S2.** Paradigmatic radio-chromatograms of  $[^{64}\text{Cu}]\text{Cu}^{2+}$ -labelled non-cyclen based ligands (1 MBq/nmol). The peak marked with an asterisk is related to unbound  $[^{64}\text{Cu}]\text{Cu}^{2+}$ .

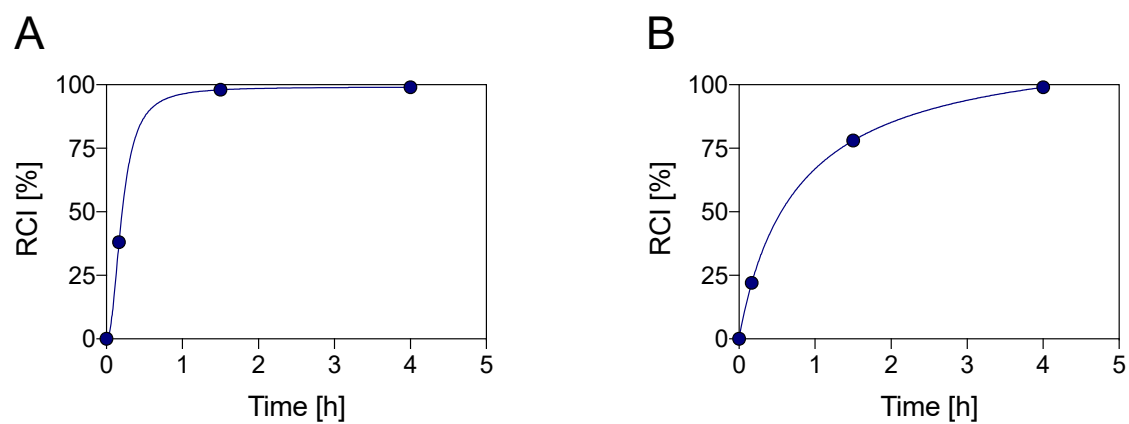

**Figure S3.** Time-dependent RCIs for  $[^{64}\text{Cu}]\text{Cu}^{2+}$  radiolabelling at pH 4.5 and RT with (A) DO4S (10 MBq/nmol) and (B) DO3S (5 MBq/nmol).

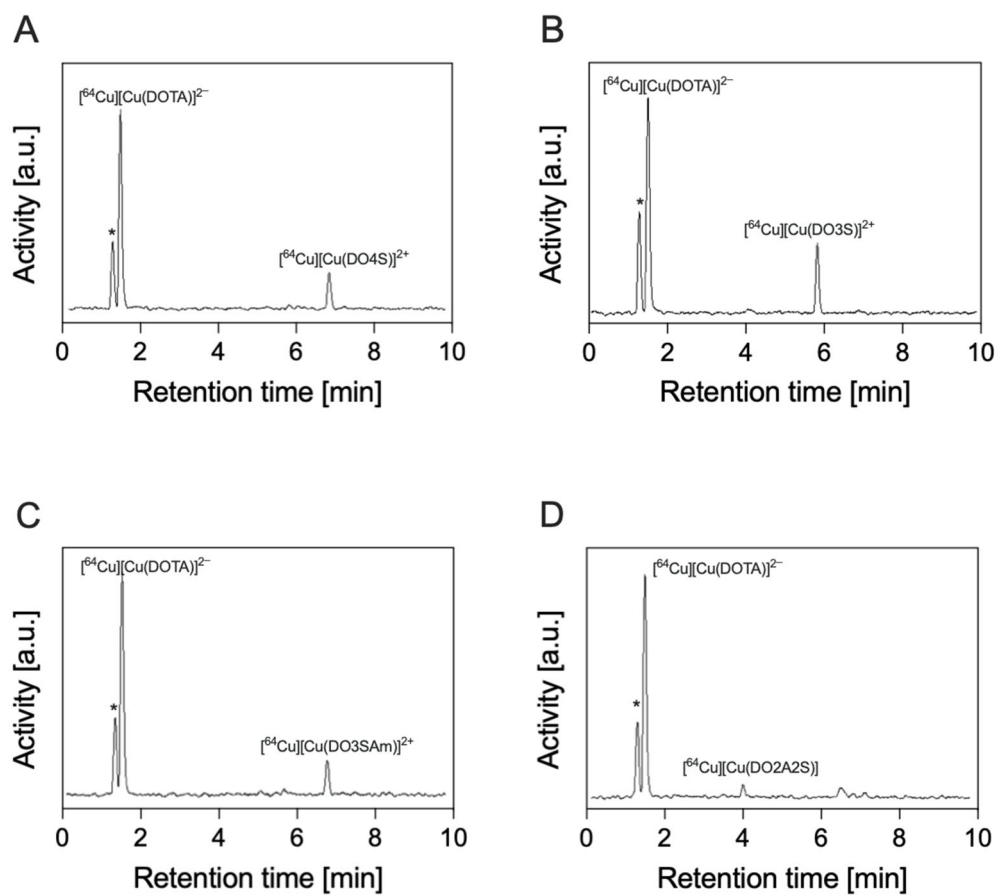

**Figure S4.** Radio-chromatograms of the DOTA competition assays (1:1 DOTA-to-ligand molar ratio) with (A) DO4S, (B) DO3S, (C) DO3SA and (D) DO2A2S at pH 4.5 and RT. The peaks marked with an asterisk show free  $[^{64}\text{Cu}]\text{Cu}^{2+}$ .

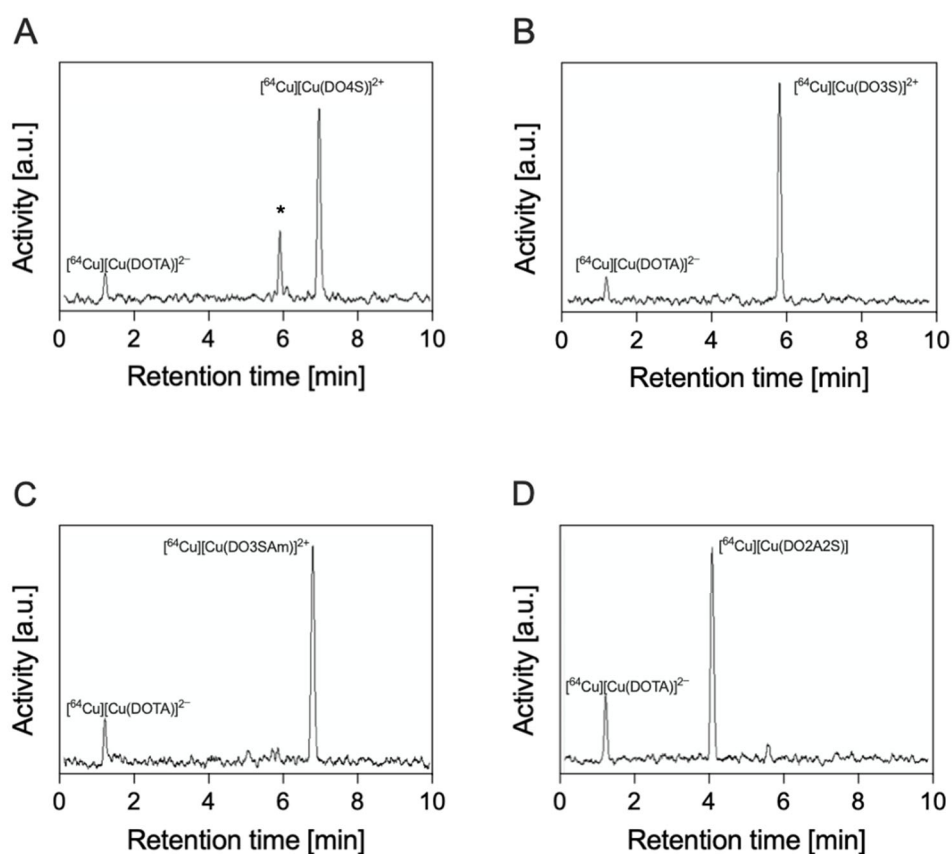

**Figure S5.** Radio-chromatograms of the DOTA competition assays (1:1 DOTA-to-ligand molar ratio) with (A) DO4S, (B) DO3S, (C) DO3SA and (D) DO2A2S at pH 7 and RT. The peak marked with an asterisk shows an impurity of DO3S.

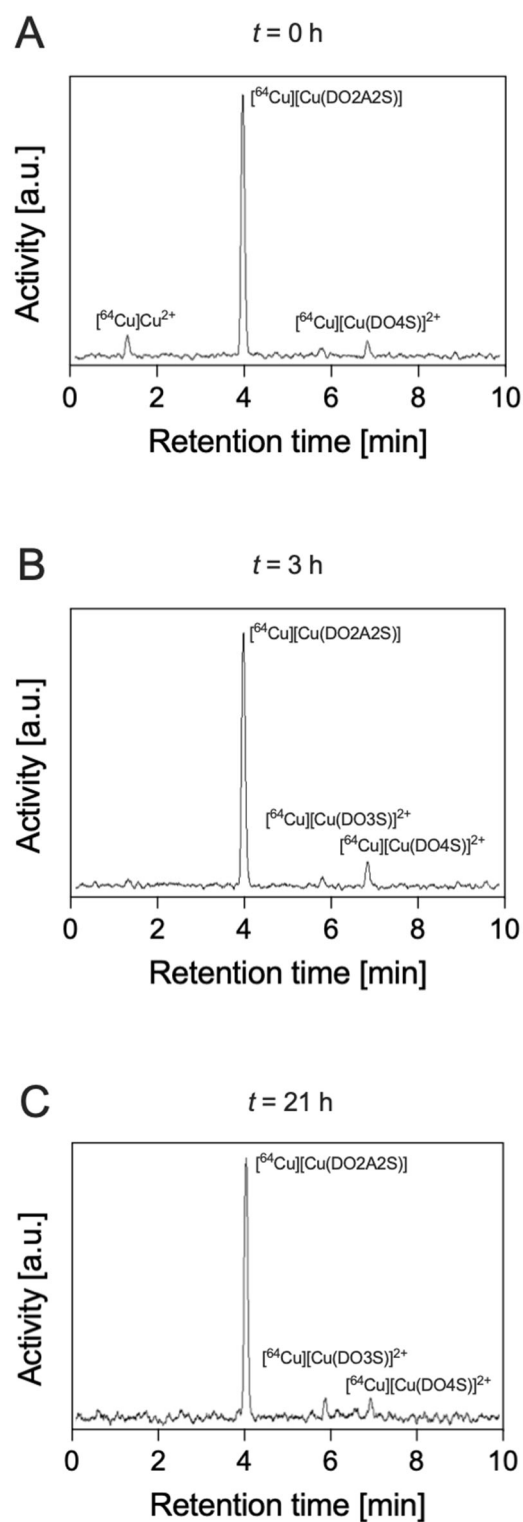

**Figure S6.** Radio-chromatograms related to the competition assay among the cyclen-based S-rich chelators (at equimolar amounts) at pH 4.5 and RT.

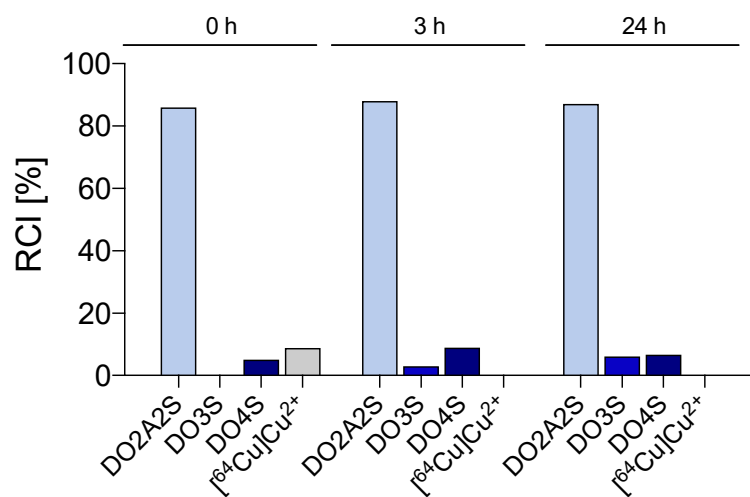

**Figure S7.** Percentage of the different [<sup>64</sup>Cu]Cu<sup>2+</sup> complexes obtained in the challenge assay at different time points. Data are referred to **Figure S6**.

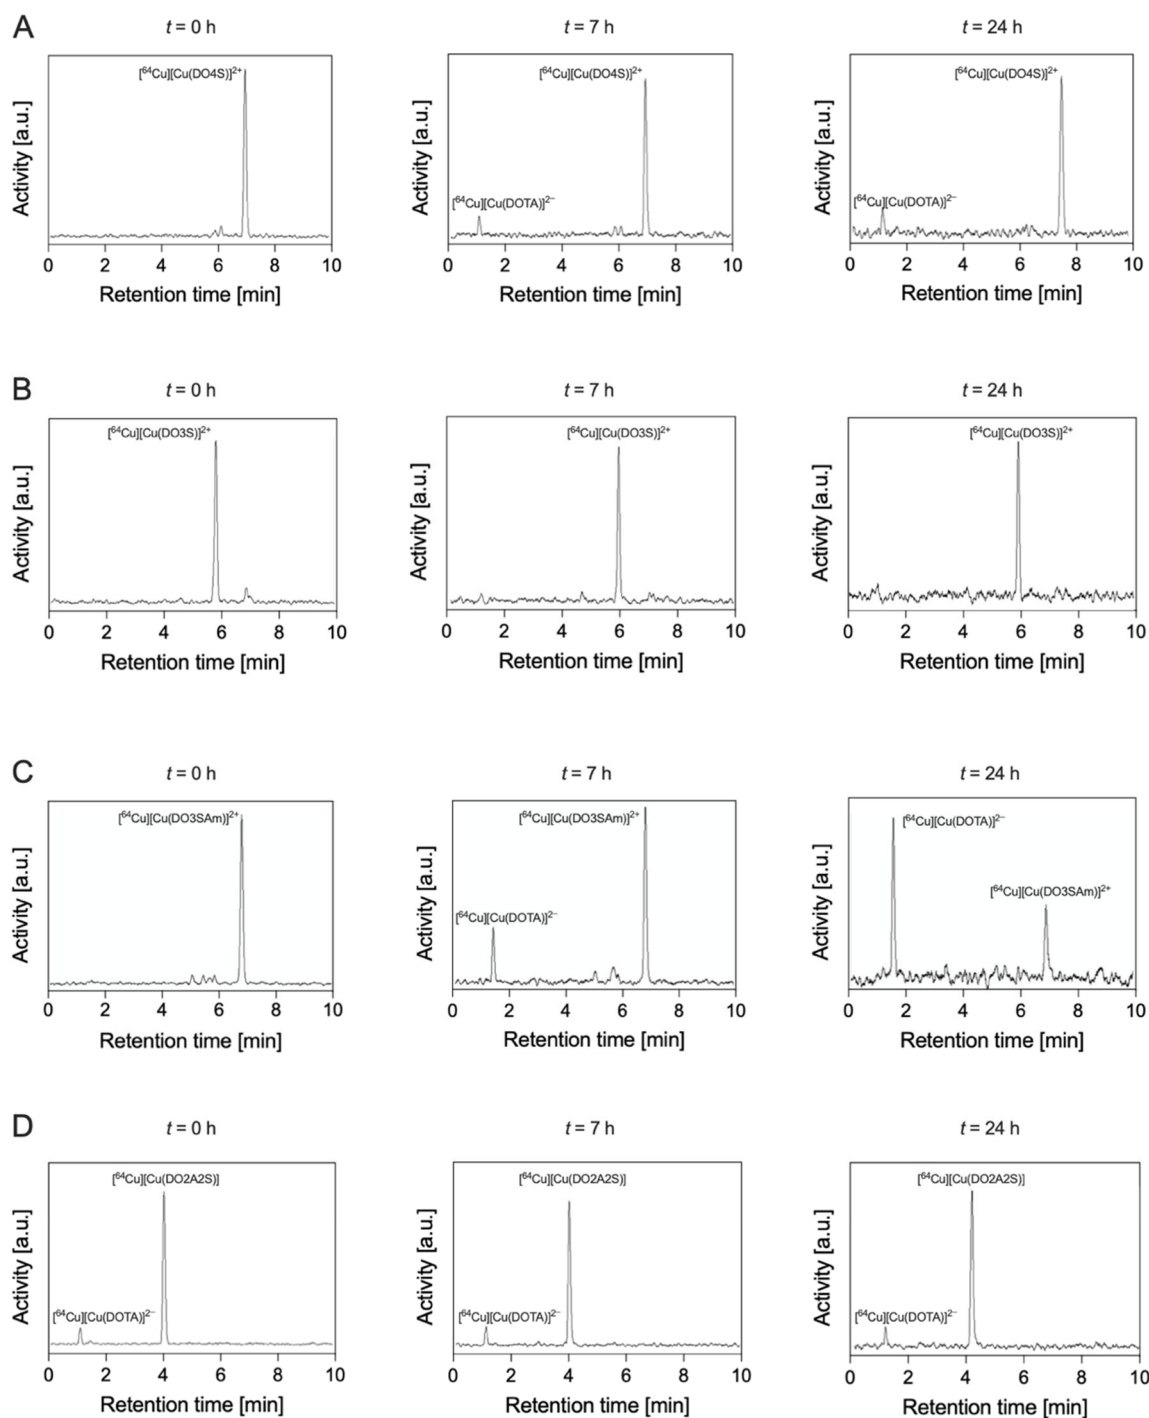

**Figure S8.** Radio-chromatograms of the DOTA stability assay (1000:1 DOTA-to-ligand molar ratio). (A)  $[\text{}^{64}\text{Cu}][\text{Cu}(\text{DO4S})]^{2+}$ , (B)  $[\text{}^{64}\text{Cu}][\text{Cu}(\text{DO3S})]^{2+}$ , (C)  $[\text{}^{64}\text{Cu}][\text{Cu}(\text{DO3SAm})]^{2+}$  and (D)  $[\text{}^{64}\text{Cu}][\text{Cu}(\text{DO2A2S})]$ .



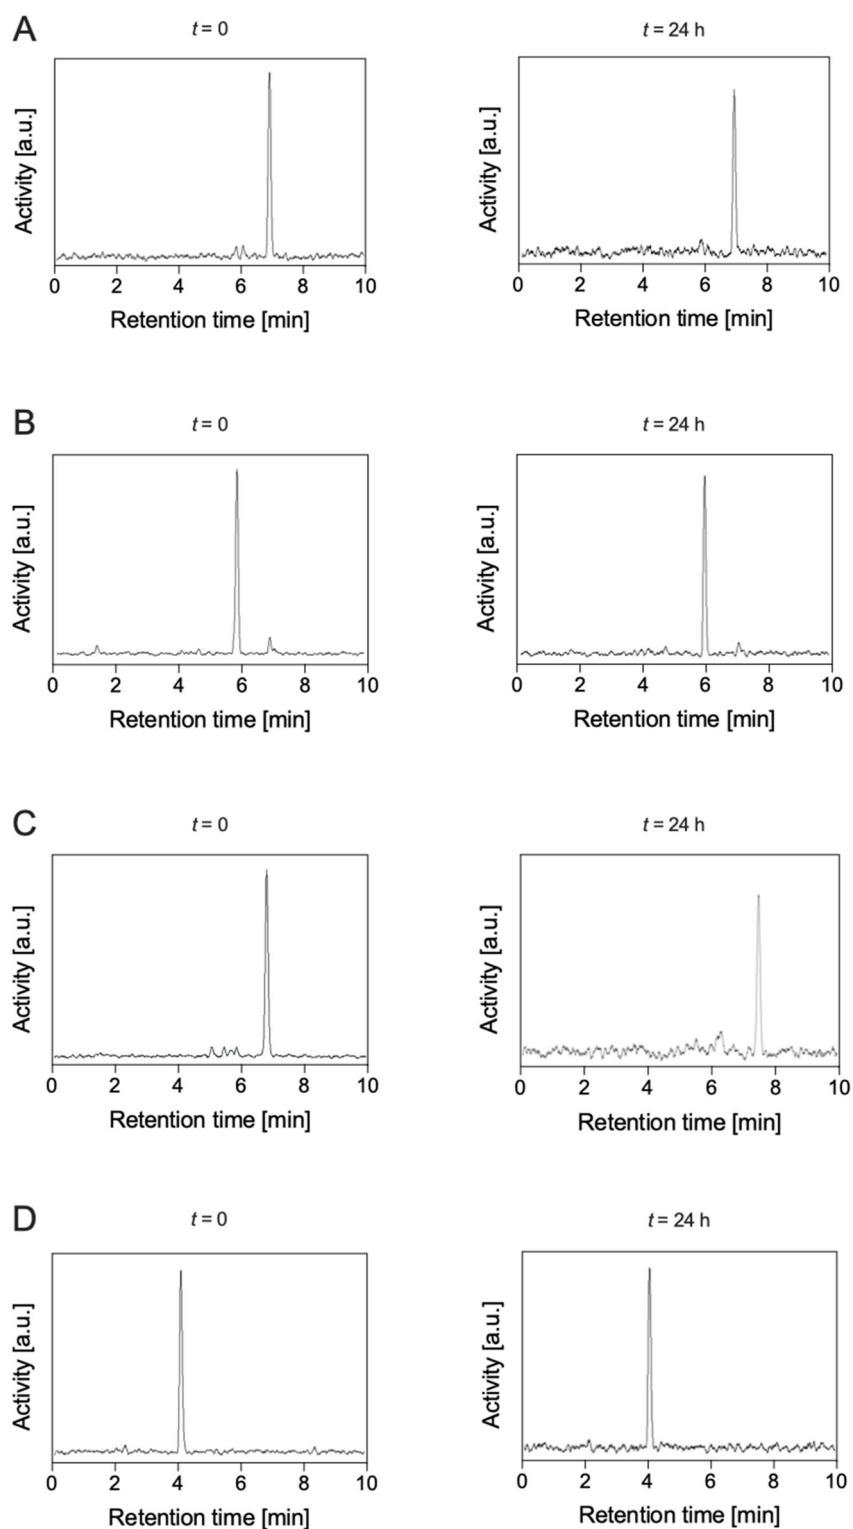

**Figure S9.** Radio-chromatograms of the PBS stability assays at low molar activity. (A)  $[\text{}^{64}\text{Cu}][\text{Cu}(\text{DO4S})]^{2+}$ , (B)  $[\text{}^{64}\text{Cu}][\text{Cu}(\text{DO3S})]^{2+}$ , (C)  $[\text{}^{64}\text{Cu}][\text{Cu}(\text{DO3SAm})]^{2+}$  and (D)  $[\text{}^{64}\text{Cu}][\text{Cu}(\text{DO2A2S})]$ .

**Table S1.** [<sup>64</sup>Cu]Cu<sup>2+</sup> incorporation in the cyclen-based ligands and NODAGA-RGD at several molar activities (pH 4.5)

|      | Molar Activity<br>[MBq/nmol] | Radiochemical Incorporation [%] |            |            |        |
|------|------------------------------|---------------------------------|------------|------------|--------|
|      |                              | NODAGA-RDG                      | DO2A2S     | DO4S       | DO3S   |
| RT   | 500                          | 1 ± 4                           | 2 ± 1      | 0          | 0      |
|      | 250                          | 1 ± 3                           | 2 ± 3      | 0          | 0      |
|      | 100                          | 3 ± 2                           | 14 ± 4     | 0          | 0      |
|      | 50                           | 24 ± 6                          | 27 ± 6     | 0          | 0      |
|      | 25                           | 58 ± 11                         | 54 ± 9     | 0          | -      |
|      | 10                           | 99 ± 13                         | 82 ± 14    | 38 ± 11    | -      |
|      | 5                            | 99 ± 1                          | 95 ± 1     | 75 ± 5     | 22 ± 3 |
|      | 3                            | 99.0 ± 0.3                      | 98 ± 2     | 82 ± 5     | 47 ± 5 |
|      | 1                            | 99 ± 1                          | 97 ± 4     | 100        | 57 ± 1 |
|      | 0.01                         | 100                             | 100        | 100        | 98 ± 2 |
|      | Molar Activity<br>[MBq/nmol] | Radiochemical Incorporation [%] |            |            |        |
|      |                              | NODAGA-RDG                      | DO2A2S     | DO4S       | DO3S   |
| 90°C | 500                          | 1.0 ± 0.2                       | 9 ± 3      | 0          | 0      |
|      | 250                          | 2.0 ± 0.4                       | 15 ± 4     | 6 ± 1      | 0      |
|      | 100                          | 9 ± 3                           | 57 ± 19    | 28 ± 5     | 0      |
|      | 50                           | 79 ± 10                         | 93 ± 11    | 82 ± 3     | -      |
|      | 25                           | 93 ± 5                          | 99.0 ± 0.3 | 90 ± 0.1   | 8 ± 7  |
|      | 10                           | 99.0 ± 0.2                      | 99.0 ± 0.1 | 99.9 ± 0.1 | -      |
|      | 5                            | 99.0 ± 0.9                      | 99.0 ± 0.6 | 99.9 ± 0.1 | 82 ± 3 |
|      | 3                            | 99.0 ± 0.1                      | 99.0 ± 0.5 | 99.9 ± 0.1 | -      |
|      | 1                            | 99.0 ± 0.1                      | 99.0 ± 0.2 | 99.9 ± 0.1 | 100    |

**Table S2.** [<sup>64</sup>Cu]Cu<sup>2+</sup> incorporation in the cyclen-based ligands and NODAGA-RGD at several molar activities (pH 7.0)

|      | Molar Activity<br>[MBq/nmol] | Radiochemical Incorporation [%] |            |            |
|------|------------------------------|---------------------------------|------------|------------|
|      |                              | NODAGA-RDG                      | DO2A2S     | DO4S       |
| RT   | 500                          | 1 ± 3                           | 9 ± 2      | 0          |
|      | 250                          | 1 ± 1                           | 19 ± 1     | 0 ± 0.5    |
|      | 100                          | 0.6 ± 0.2                       | 52 ± 8     | 3 ± 2      |
|      | 50                           | 0.6 ± 6                         | 92 ± 6     | 25 ± 16    |
|      | 25                           | 50 ± 9                          | 99.4 ± 0.6 | 86 ± 14    |
|      | 10                           | 97.1 ± 0.1                      | 98.7 ± 0.2 | 99.9 ± 0.1 |
|      | 5                            | 98.2 ± 0.1                      | 98.3 ± 0.1 | 99.9 ± 0.1 |
|      | 3                            | 98.2 ± 0.1                      | 98.7 ± 0.1 | 99.9 ± 0.1 |
|      | 1                            | 97.9 ± 0.1                      | 98.4 ± 0.1 | 99.9 ± 0.1 |
|      | Molar Activity<br>[MBq/nmol] | Radiochemical Incorporation [%] |            |            |
|      |                              | NODAGA-RDG                      | DO2A2S     | DO4S       |
| 90°C | 500                          | 2.4 ± 0.1                       | 2.4 ± 0.1  | 0          |
|      | 250                          | 1.7 ± 0.1                       | 4.1 ± 0.1  | 4.7 ± 0.1  |
|      | 100                          | 1.1 ± 1                         | 68 ± 9     | 11 ± 3     |
|      | 50                           | 22 ± 19                         | 95 ± 2     | 39 ± 8     |
|      | 25                           | 83 ± 16                         | 99 ± 8     | 83 ± 17    |
|      | 10                           | 98.5 ± 0.1                      | 99.5 ± 0.1 | 99.9 ± 0.1 |
|      | 5                            | 98.5 ± 0.1                      | 99.4 ± 0.1 | 99.9 ± 0.1 |
|      | 2                            | 98.4 ± 0.1                      | 99.2 ± 0.1 | 99.9 ± 0.1 |
|      | 1                            | 98.4 ± 0.1                      | 99.5 ± 0.1 | 99.9 ± 0.1 |

**Table S3.** [ $^{64}\text{Cu}$ ] $\text{Cu}^{2+}$  incorporation in the non-cyclen-based ligands and NODAGA-RGD at several molar activities (pH 7.0)

|    | Molar Activity<br>[MBq/nmol] | Radiochemical Incorporation [%] |                |              |
|----|------------------------------|---------------------------------|----------------|--------------|
|    |                              | NODAGA-RDG                      | TRI4S          | TE4S         |
| RT | 500                          | 1 $\pm$ 3                       | 0              | 0            |
|    | 250                          | 1 $\pm$ 1                       | 0              | 0            |
|    | 100                          | 0.6 $\pm$ 0.2                   | 32 $\pm$ 4     | 0            |
|    | 50                           | 0.6 $\pm$ 6                     | 57 $\pm$ 3     | 23 $\pm$ 2   |
|    | 25                           | 50 $\pm$ 9                      | 76 $\pm$ 3     | 24 $\pm$ 5   |
|    | 10                           | 97.1 $\pm$ 0.1                  | 99.9 $\pm$ 0.1 | 32 $\pm$ 3   |
|    | 5                            | 98.2 $\pm$ 0.1                  | 99.9 $\pm$ 0.1 | 41.5 $\pm$ 3 |
|    | 3                            | 98.2 $\pm$ 0.1                  | 99.9 $\pm$ 0.1 | 40 $\pm$ 4   |
|    | 1                            | 97.9 $\pm$ 0.1                  | 99.9 $\pm$ 0.1 | 39 $\pm$ 4   |
